# Supplementary material for: Fe/Fe3C@N-doped porous carbon hybrids derived from nano-scale MOFs: robust and enhanced heterogeneous catalyst for peroxymonosulfate activation
Source: Royal Society of Chemistry journal article supplement (doi:10.1039/c6cy02130a), 2016-12-12
Supplement: c6cy02130a1.pdf [file c6cy02130a1.pdf]

Fe/Fe<sub>3</sub>C@N-doped porous carbon hybrids derived from nano-scale MOFs:  
robust and enhanced heterogeneous catalyst for peroxymonosulfate  
activation

### **Supplementary Information**

**Tao Zeng, Haiyan Zhang, Zhiqiao He, Jianmeng Chen and Shuang Song \***

*College of Environment, Zhejiang University of Technology, Hangzhou 310032, P.  
R. China. Email: [ss@zjut.edu.cn](mailto:ss@zjut.edu.cn); Fax: +86-571-88320276; Tel: +86-571-88320726*

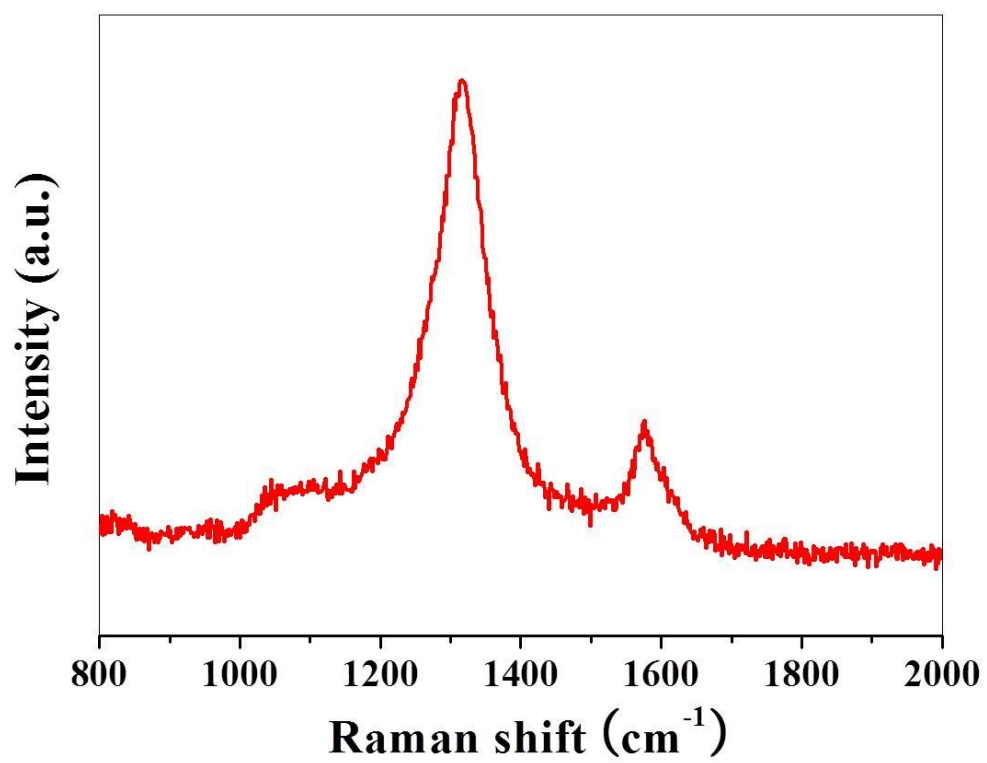

**Fig. S1** Raman spectrum of Fe/Fe<sub>3</sub>C@NC samples.

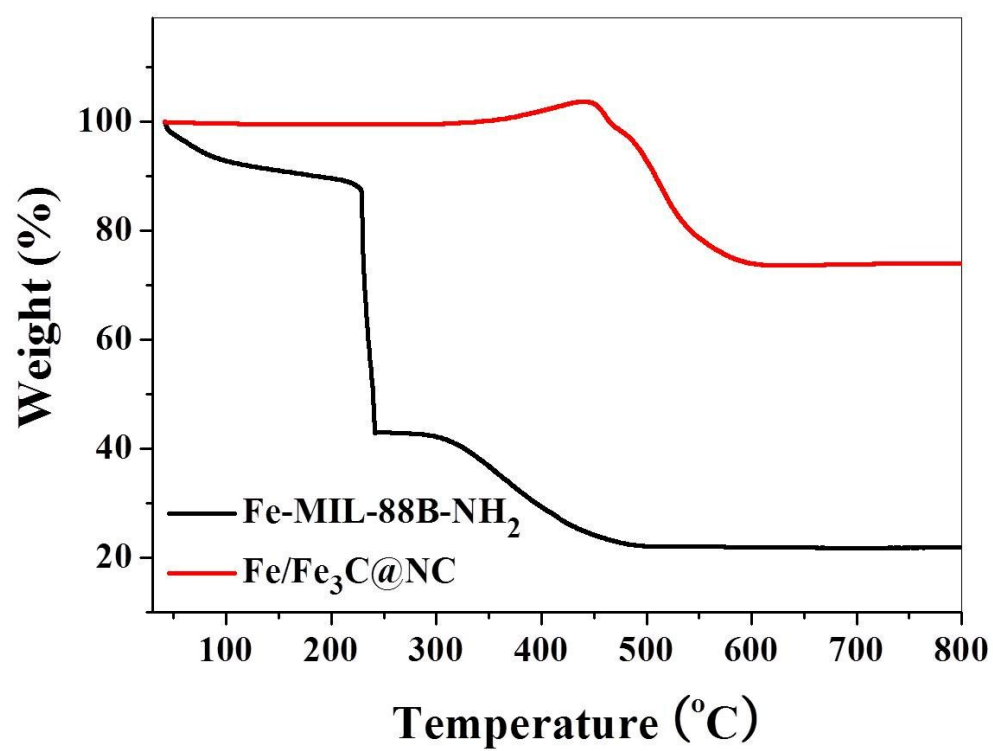

**Fig. S2** TGA curves of Fe-MIL-88B-NH<sub>2</sub> and Fe/Fe<sub>3</sub>C@NC samples.

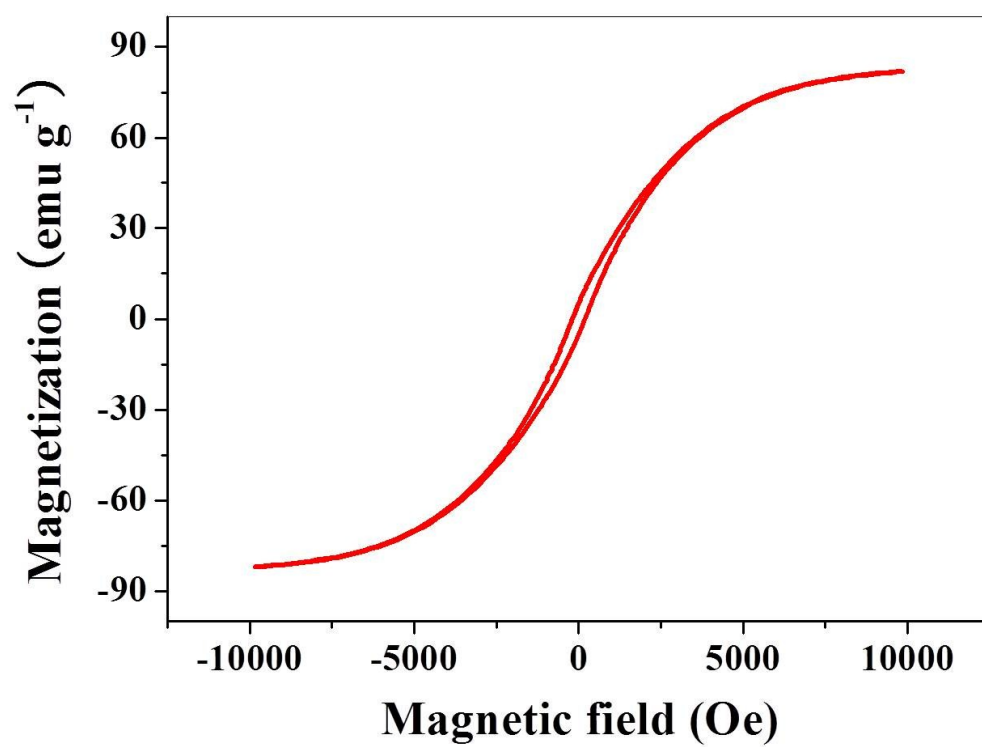

**Fig. S3** Magnetization curves of Fe/Fe<sub>3</sub>C@NC hybrids.

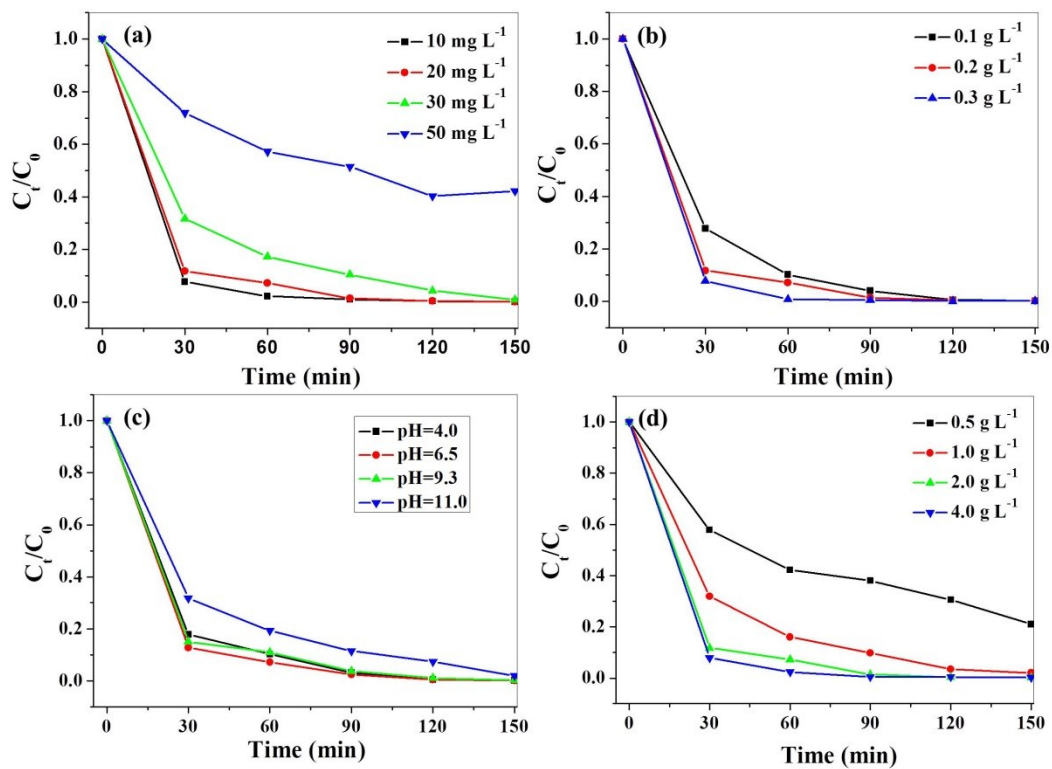

**Fig. S4** Effects of initial 4-CP concentration (a), catalyst dosage (b), initial solution pH (c), and PMS concentration (d) on 4-CP degradation.

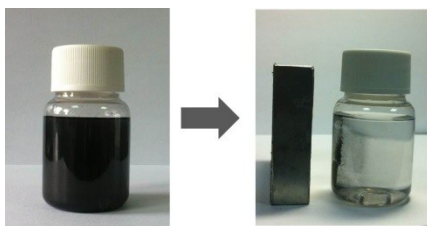

**Fig. S5** Pictures show the magnetic separation of the catalyst in mixture

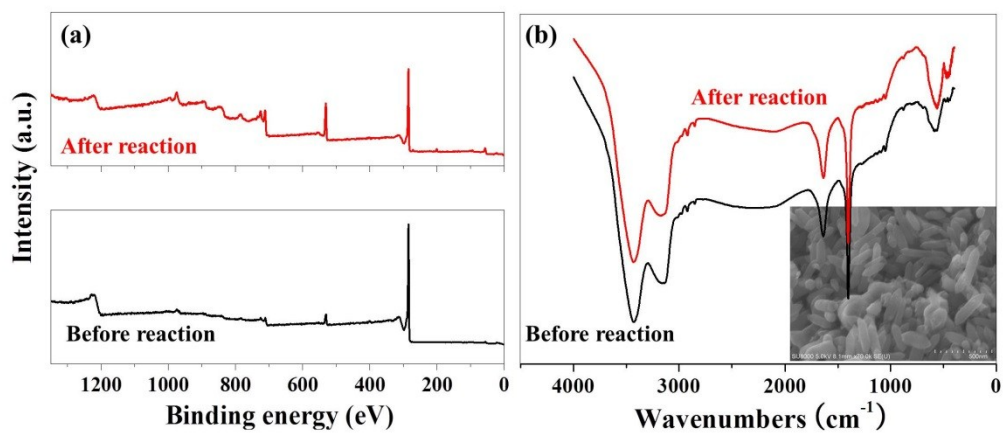

**Fig. S6** XPS (a) and FTIR spectra (b) of catalyst before and after use; the inset in (b) is the SEM image of catalyst after use.

Table S1 Comparison of different catalysts under same conditions

| <b>Catalyst</b>                    | <b>Concentration of 4-CP</b> | <b>Dosage of catalyst</b> | <b>Dosage of PMS</b> | <b>Removal of 4-CP within 90 min</b> | <b>reference</b> |
|------------------------------------|------------------------------|---------------------------|----------------------|--------------------------------------|------------------|
| <b>Fe/Fe<sub>3</sub>C@NC</b>       | 20 mg L <sup>-1</sup>        | 0.2 g L <sup>-1</sup>     | 2 g L <sup>-1</sup>  | 99%                                  | This work        |
| <b>Co<sub>3</sub>O<sub>4</sub></b> | 20 mg L <sup>-1</sup>        | 0.2 g L <sup>-1</sup>     | 2 g L <sup>-1</sup>  | 40%                                  | This work        |
| <b>Fe<sub>3</sub>O<sub>4</sub></b> | 20 mg L <sup>-1</sup>        | 0.2 g L <sup>-1</sup>     | 2 g L <sup>-1</sup>  | 17%                                  | This work        |
| <b>Carbon@Co</b>                   | 20 mg L <sup>-1</sup>        | 0.2 g L <sup>-1</sup>     | 2 g L <sup>-1</sup>  | 96%                                  | 1                |
| <b>N-doping G</b>                  | 20 mg L <sup>-1</sup>        | 0.2 g L <sup>-1</sup>     | 2 g L <sup>-1</sup>  | 55%                                  | 1                |

[1] T. Zeng, H. Y. Zhang, Z. Q. He, J. M. Chen, S. Song, Sci Rep. **2016**, 6,33348.
